# Supplementary material for: Ullmann coupling reaction of aryl chlorides on Au(111) using dosed Cu as a catalyst and the programmed growth of 2D covalent organic frameworks
Source: Royal Society of Chemistry journal article supplement (doi:10.1039/c6cc03137d), 2016-01-01
Supplement: c6cc03137d1.pdf [file c6cc03137d1.pdf]

# **Ullmann coupling reaction of aryl chlorides on Au(111) using dosed Cu as catalyst and the programmed growth of 2D covalent organic frameworks**

*Ke Ji Shi, Xin Zhang, Chen Hui Shu, Deng Yuan Li, Xin Yan Wu and Pei Nian Liu\**

*Shanghai Key Laboratory of Functional Materials Chemistry, Key Lab for Advanced Materials  
and Institute of Fine Chemicals, East China University of Science and Technology, 130 Meilong  
Road, Shanghai, 200237, China*

*liupn@ecust.edu.cn*

## **Supporting Information**

- 1. Synthesis of organic molecules**
- 2. Supplemental STM image**
- 3. References**

## 1. Synthesis of organic molecules

Synthesis of 4,4''-dichloro-1,1':4',1''-terphenyl (DCTP) followed known procedures.<sup>1</sup>

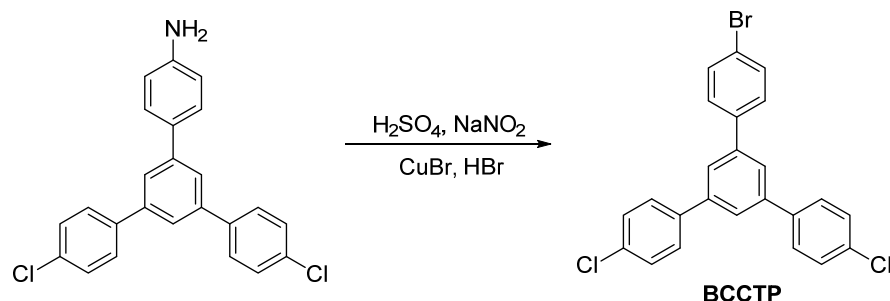

**4-Bromo-4''-chloro-5'-(4-chlorophenyl)-1,1':3',1''-terphenyl (BCCTP).** In a three-necked round-bottom flask, 4''-chloro-5'-(4-chlorophenyl)-[1,1':3',1''-terphenyl]-4-amine<sup>2</sup> (1.5 g, 3.84 mmol) was added to glacial acetic acid (21.17 mL) at room temperature. Sulfuric acid (98%, 5.24 mL) was added to the reaction mixture, and then saturated sodium nitrite (0.636 g, 9.22 mmol) solution was added. The reaction mixture was stirred at 60 °C and cooled to room temperature after 1 h. The mixture of CuBr (0.595 g, 4.15 mmol) and HBr·H<sub>2</sub>O (2.61 mL) was added to the reaction mixture, then the reaction mixture was warmed to 100 °C. After 1 h, the reaction mixture was cooled to 0 °C and extracted by Et<sub>2</sub>O, then washed with saturated sodium bicarbonate and dried with Mg<sub>2</sub>SO<sub>4</sub>. Flash chromatography on silica gel gave the product (0.123 g, 0.271 mmol) as a white solid. Mp:226.1-228.5 °C; <sup>1</sup>H NMR (CDCl<sub>3</sub>, 400 MHz) δ 7.45 (4H, d, *J* = 8.4 Hz), 7.53 (2H, d, *J* = 8.4 Hz), 7.58-7.61 (6H, m), 7.68 (2H, s); <sup>13</sup>C NMR (CDCl<sub>3</sub>, 100 MHz) δ 122.2, 125.1, 125.2, 128.7, 129.0, 129.2, 129.3, 132.2, 134.1, 139.3, 139.8, 141.6; HRMS (EI, TOF) calcd for C<sub>24</sub>H<sub>15</sub>BrCl<sub>2</sub><sup>+</sup> [M]<sup>+</sup>: 451.9734, found: 451.9736.

## 2. Supplemental STM image

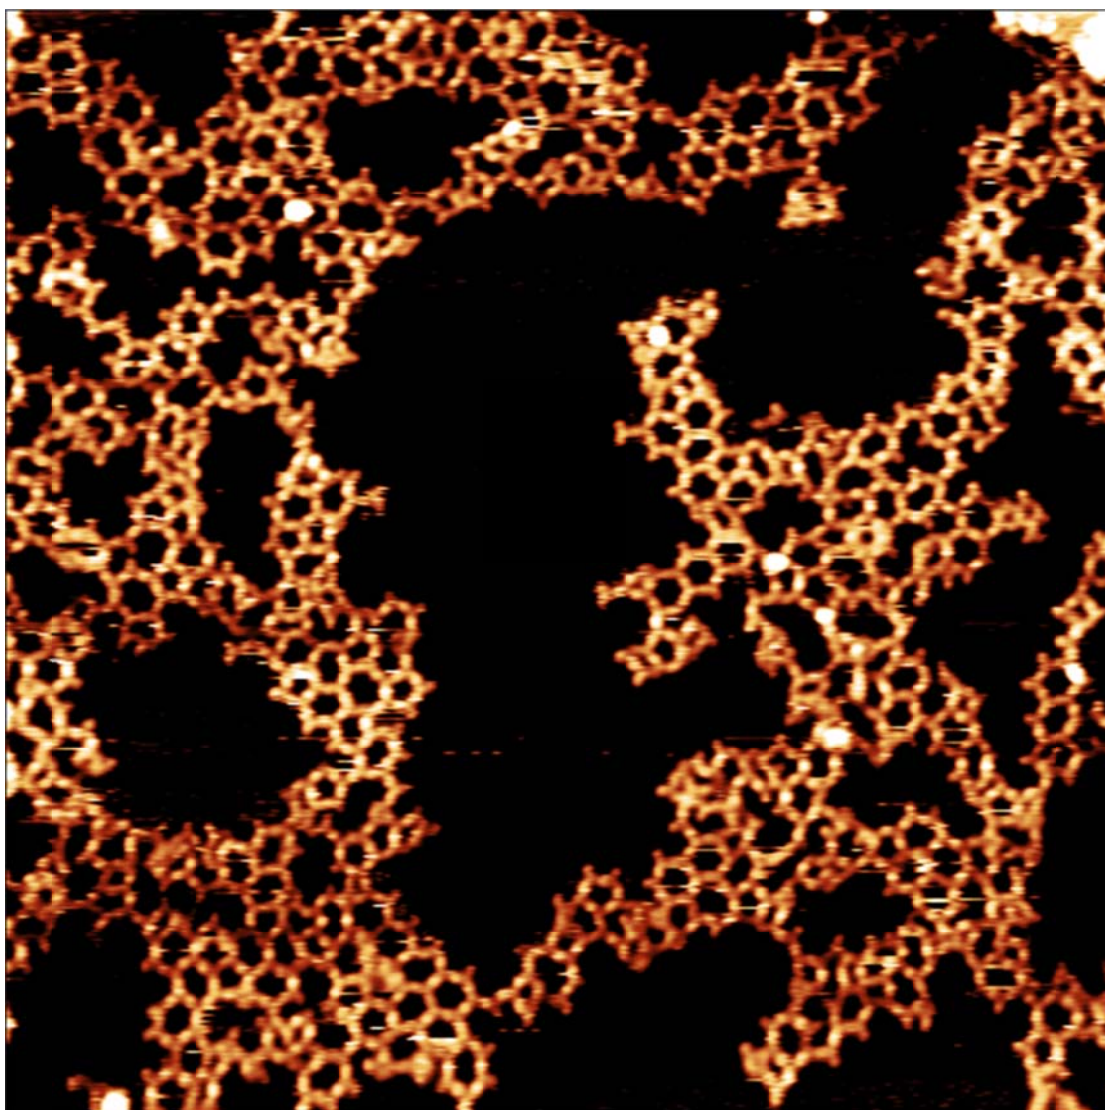

**Figure S1.** BCCTP deposited on Cu(111) held at room temperature and annealing to 280 °C for 30 mins. (65 nm × 65 nm, -2.5 V, -0.09 nA)

### 3. References

- [1] K. J. Shi, D. W. Yuan, C. X. Wang, C. H. Shu, D. Y. Li, Z. L. Shi, X. Y. Wu, P. N. Liu, *Org. Lett.* **2016**, *18*, 1282–1285.
- [2] J. Eichhorn, T. Strunskus, A. Rastgoo-Lahrood, D. Samanta, M. Schmittel, M. Lackinger, *Chem. Comm.*, **2014**, *50*, 7680-7682.
